# Supplementary material for: Magnetospheric convection in a hybrid-Vlasov simulation
Source: Copernicus journal article supplement (doi:10.5194/angeo-43-709-2025), 2025-11-21
Supplement: Supplementary file [file angeo-43-709-2025-supplement-title-page.pdf › angeo-43-709-2025-supplement-title-page.pdf]

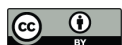

*Supplement of*

## **Magnetospheric convection in a hybrid-Vlasov simulation**

**Shi Tao et al.**

*Correspondence to:* Shi Tao ([shi.tao@helsinki.fi](mailto:shi.tao@helsinki.fi))

- [angeo-43-709-2025-supplement-title-page.pdf](#)
- [Supplementary\\_Material](#)
  - [S1\\_video.mp4](#)

The copyright of individual parts of the supplement might differ from the article licence.
